# Supplementary material
Source: HighWire-hosted journal article supplement (http://erj.ersjournals.com/highwire/filestream/114695/field_highwire_adjunct_files/0/ERJ-02107-2014_Supplemental_Material.pdf)
Supplement: ERJ-02107-2014_Supplemental_Material.pdf [file ERJ-02107-2014_Supplemental_Material.pdf]

## Supplementary Methods

In a prespecified analysis, changes from baseline in FVC and FEV<sub>1</sub> were compared between everolimus and historical placebo data from the MILES study<sup>25</sup> by using the following Bayesian approach. It was assumed that Y, the observed change from baseline in FVC or FEV<sub>1</sub>, followed a normal distribution  $N(\theta_i, \sigma^2)$ , where the subscript i was a placeholder for the treatment arm (1: RAD001; 0: Placebo).  $\sigma=233$  was for MILES placebo arm, and  $\sigma$  for RAD arm was estimated from data.

It was further assumed that  $\theta_i$  follows a prior distribution  $N(\mu_i, \sigma^2/n_{0i})$ , where the parameter  $n_{0i}$  weighed the available prior information (to account for between-trial variation). The quantity of interest was the treatment effect  $\theta_1 - \theta_0$ , and the posterior probabilities that this quantity was (a) greater than 0 mL, or (b) greater than 100 mL were estimated using Markov Chain Monte Carlo (MCMC) simulation by SAS MCMC procedure.

Assuming exchangeability among historical and concurrent placebo controls,  $\mu_0$  and  $\sigma$  for FVC were determined as follows:

- Based on the result in the MILES study (Table 2), -11 mL was the rate of change per month for Placebo (N=43), therefore  $\mu_0=-66$  mL was chosen for the prior mean of change from baseline to 6 months
- Based on the result of change from baseline to 12 months for Placebo (N=34) in the MILES study (Table 2),  $\sigma=233$  mL was chosen for the standard deviation.

To account for between-trial heterogeneity, the sample size of n=43 from the MILES trial was downweighted to obtain an effective sample size  $n^*$  according to formula (11) of Neuenschwander et al (2010)<sup>37</sup>

$$n^* = \frac{\sigma^2}{\frac{\sigma^2}{N} + \tau^2(1 + (1/H))} \quad (11)$$

Assuming medium between trial heterogeneity,  $\sigma/\tau=8$ , (Neuenschwander et al, 2010<sup>37</sup>, Table 1) an effective sample size of  $n^*=18$  is obtained and hence used for  $n_{00}$ . Since no prior information on the effect of RAD001 on FVC was available, an “improper prior” was used for this treatment arm, that is,  $n_{01}=0$ .

The proposed proof of concept for our study was a 90% level of proof that the difference in FVC change from baseline for everolimus versus placebo was >0 mL and a 50% level of proof of a  $\geq 100$  mL difference between the treatment groups.

FEV<sub>1</sub> was analyzed in the same fashion. Moreover, the choice of  $\mu_0 = -72 (= -12 \times 6)$  and  $\sigma = 182$  was for the prior mean of change from baseline to 6 months and standard deviation for placebo group, and  $\sigma$  for RAD arm was estimated from data. Assuming the same scenarios for between trial heterogeneity, the values of  $n_{00}$  and  $n_{01}$  was the same as for FVC.

### **Supplementary Results**

**Supplemental Figure 1** shows spaghetti plots of individual patient profiles for FVC and FEV<sub>1</sub>. After 26 weeks of treatment with everolimus, the probabilities that the placebo-corrected mean changes from baseline in FVC and FEV<sub>1</sub> were >0 mL and >100 mL were 85% and 38%, respectively, and 100% and 93%, respectively (**Supplemental Table 1**).

## **Supplemental Figure Title and Legend**

**Supplemental Figure 1.** Individual spaghetti plots of postbronchodilator A) FVC and B) FEV<sub>1</sub> over 26 weeks of treatment with everolimus (PD analysis set)

FEV<sub>1</sub>: forced expiratory volume in 1 second; FVC: forced vital capacity; PD: pharmacodynamic.

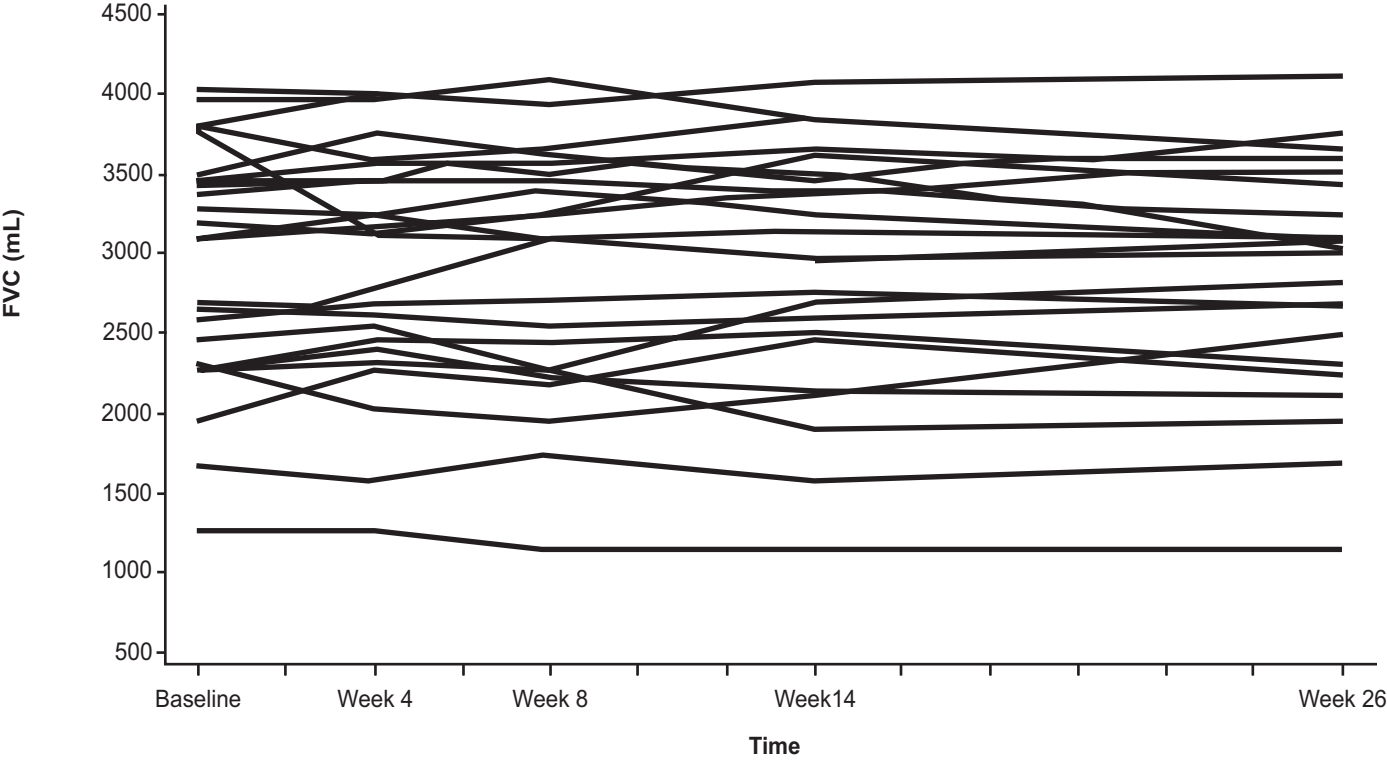

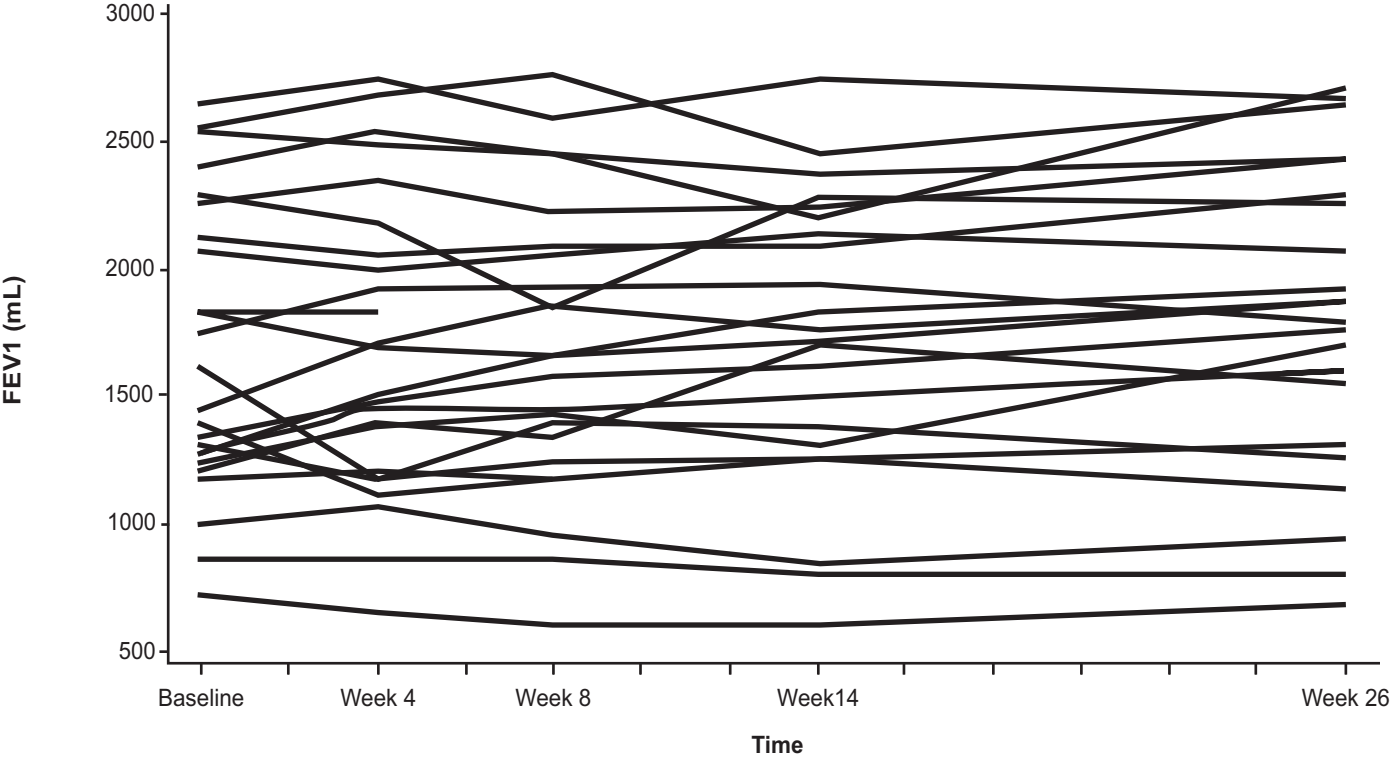

**Supplemental Table 1.** Summary of change from baseline in FVC and FEV<sub>1</sub> over time (pharmacodynamics analysis set)

|         | Everolimus     |               | MILES placebo <sup>b</sup> | Difference of everolimus and MILES placebo |                      |                        |
|---------|----------------|---------------|----------------------------|--------------------------------------------|----------------------|------------------------|
|         | N <sup>a</sup> | Mean (95% CI) | Mean (95% CI)              | Mean (5th–95th percentile range)           | P (difference >0 mL) | P (difference >100 mL) |
| FVC, mL |                |               |                            |                                            |                      |                        |
| Week 4  | 24             | 13 (–71–97)   | –11 (–109–87)              | 23 (–96–147)                               | 62%                  | 15%                    |
| Week 8  | 22             | 8 (–96–112)   | –22 (–128–84)              | 30 (–94–152)                               | 65%                  | 18%                    |
| Week 14 | 23             | 31 (–58–121)  | –33 (–139–73)              | 63 (–58–184)                               | 81%                  | 31%                    |
| Week 26 | 23             | 10 (–111–132) | –66 (–181–49)              | 76 (–45–196)                               | 85%                  | 38%                    |
| Week 38 | 14             | 100 (–73–273) |                            |                                            |                      |                        |
| Week 50 | 11             | 148 (–45–341) |                            |                                            |                      |                        |
| Week 62 | 4              | 50            |                            |                                            |                      |                        |

|                                                                                                                                                                                                                                                                                                                                  |    |                  |                  |              |      |     |
|----------------------------------------------------------------------------------------------------------------------------------------------------------------------------------------------------------------------------------------------------------------------------------------------------------------------------------|----|------------------|------------------|--------------|------|-----|
|                                                                                                                                                                                                                                                                                                                                  |    | (-227-327)       |                  |              |      |     |
| End of study <sup>c</sup>                                                                                                                                                                                                                                                                                                        | 16 | 84<br>(-122-290) |                  |              |      |     |
| FEV <sub>1</sub> , mL                                                                                                                                                                                                                                                                                                            |    |                  |                  |              |      |     |
| Week 4                                                                                                                                                                                                                                                                                                                           | 24 | 16 (-52-84)      | -12 (-88-64)     | 27 (-65-122) | 68%  | 10% |
| Week 8                                                                                                                                                                                                                                                                                                                           | 22 | 22 (-60-104)     | -24<br>(-106-58) | 46 (-50-140) | 78%  | 18% |
| Week 14                                                                                                                                                                                                                                                                                                                          | 23 | 41 (-49-131)     | -36<br>(-118-46) | 76 (-19-173) | 90%  | 34% |
| Week 26                                                                                                                                                                                                                                                                                                                          | 23 | 114 (11-217)     | -72<br>(-162-18) | 186 (93-279) | 100% | 93% |
| Week 38                                                                                                                                                                                                                                                                                                                          | 14 | 124<br>(-23-272) |                  |              |      |     |
| Week 50                                                                                                                                                                                                                                                                                                                          | 11 | 150<br>(-24-324) |                  |              |      |     |
| Week 62                                                                                                                                                                                                                                                                                                                          | 4  | -3<br>(-254-249) |                  |              |      |     |
| End of study <sup>c</sup>                                                                                                                                                                                                                                                                                                        | 16 | 56 (-59-170)     |                  |              |      |     |
| <sup>a</sup> Number of patients in everolimus treatment group at each visit.<br><sup>b</sup> Number of patients in MILES placebo group assumed as 18 based on historical data. Mean values derived from Bayesian posterior distribution assuming an FVC decline of 11 mL/month with SD 233 mL and an FEV <sub>1</sub> decline of |    |                  |                  |              |      |     |

12 mL/month with SD 182 mL.

4–8 weeks after the last dose of study drug.

**Abbreviations:** CI, confidence interval; FEV<sub>1</sub>, forced expiration volume in 1 second; FVC, forced vital capacity; N, number of patients; P, probability.

### Supplemental Reference

- (37) Neuenschwander B, Capkun-Niggli G, Branson M, Spiegelhalter DJ. Summarizing historical information on controls in clinical trials. *Clin Trials*. 2010;7(1):5-18.
